# Supplementary material for: PIN1 protects auditory hair cells from senescence via autophagy
Source: PeerJ journal article supplement (doi:10.7717/peerj.14267), 2022-11-01
Supplement: Raw_date(figure2,_4).zip [file Raw_date%28figure2%2C_4%29.zip]

## Sheet: Control
c1
clik	20db
tone
	4k	25db	20k	50db
	8k	25db	24k	55db
	12k	25db	28k	35db
	16k	35db	32k	30db
c2
clik	25db
tone
	4k	25db	20k	50db
	8k	25db	24k	50db
	12k	30db	28k	35db
	16k	40db	32k	35db
c3
clik	25db
tone	4k	25db	20k	50db
	8k	25db	24k	50db
	12k	30db	28k	35db
	16k	40db	32k	30db	40
c4
clik	20db
tone	4k	25db	20k	45db
	8k	30db	24k	50db
	12k	30db	28k	40db
	16k	40db	32k	35db
c5
clik	20db
tone	4k	25db	20k	40db
	8k	30db	24k	55db
	12k	25db	28k	35db
	16k	35db	32k	35db	40
c6
clik	25db
tone	4k	25db	20k	50db
	8k	25db	24k	55db
	12k	30db	28k	35db
	16k	35db	32k	35db	55

## Sheet: juglon
1
tone
	4k	40db	20k	75db
	8k	40db	24k	85db
	12k	35db	28k	90db
	16k	45db	32k	90db
2
tone
	4k	40db	20k	60db
	8k	40db	24k	70db
	12k	35db	28k	90db
	16k	45db	32k	90db
3
tone
	4k	45db	20k	45db
	8k	60db	24k	70db
	12k	40db	28k	80db
	16k	45db	32k	90db
4
tone
	4k	40db	20k	80db
	8k	55db	24k	90db
	12k	35db	28k	90db
	16k	80db	32k	90db
5
tone
	4k	25bd	20k	55db
	8k	50db	24k	90db
	12k	45db	28k	90db
	16k	50db	32k	90db
6
tone
	4k	40db	20k	60db
	8k	55db	24k	60db
	12k	35db	28k	80db
	16k	45db	32k	90db

## Sheet: DMSO
c1
tone
	4k	25db	20k	50db
	8k	25db	24k	55db
	12k	25db	28k	35db
	16k	35db	32k	30db
c2
tone
	4k	25db	20k	50db
	8k	25db	24k	50db
	12k	30db	28k	35db
	16k	40db	32k	35db
c3
tone	4k	25db	20k	50db
	8k	25db	24k	50db
	12k	30db	28k	35db
	16k	40db	32k	40db
c4
tone	4k	25db	20k	45db
	8k	30db	24k	50db
	12k	30db	28k	40db
	16k	40db	32k	35db
c5
tone	4k	25db	20k	40db
	8k	30db	24k	55db
	12k	25db	28k	35db
	16k	35db	32k	40db
c6
tone	4k	25db	20k	50db
	8k	25db	24k	55db
	12k	30db	28k	35db
	16k	35db	32k	55db
